# Supplementary material
Source: PubMed Central journal article supplement (PMC2748033)
Supplement: supp_83_19_10016__1.pdf [file supp_83_19_10016__1.pdf]

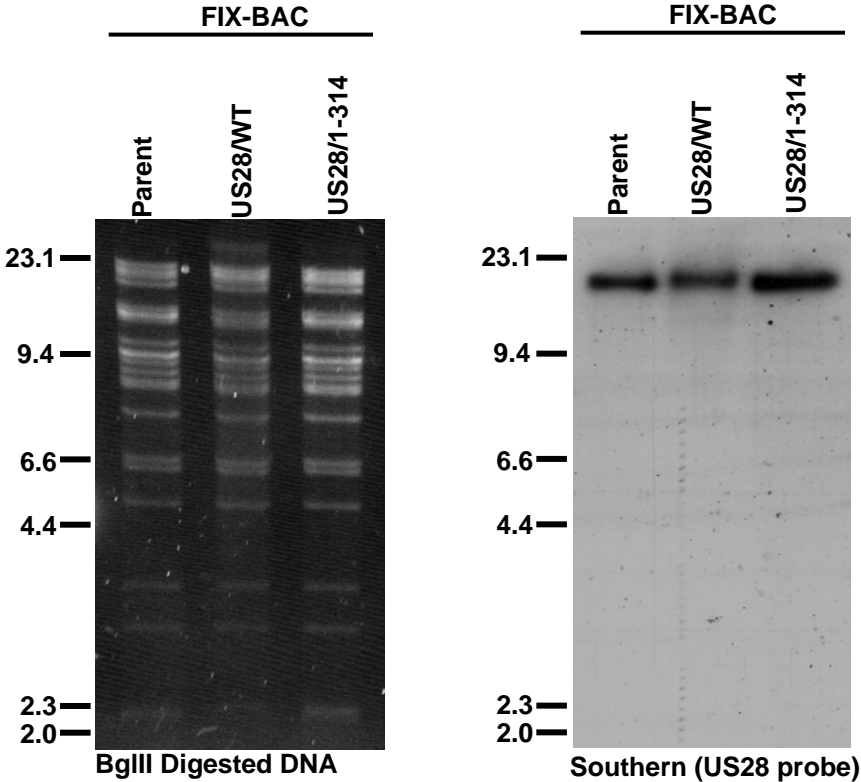

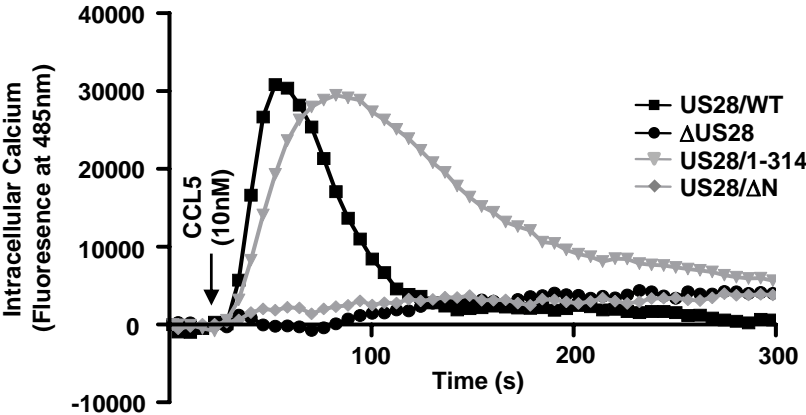

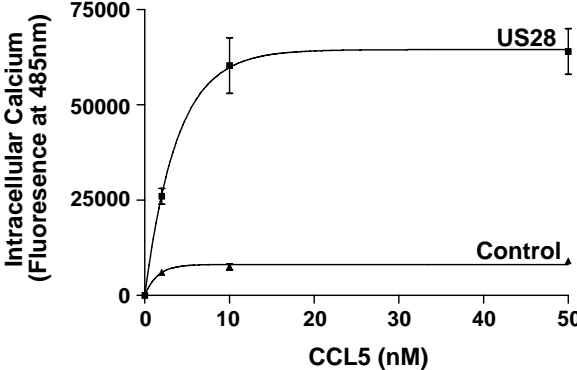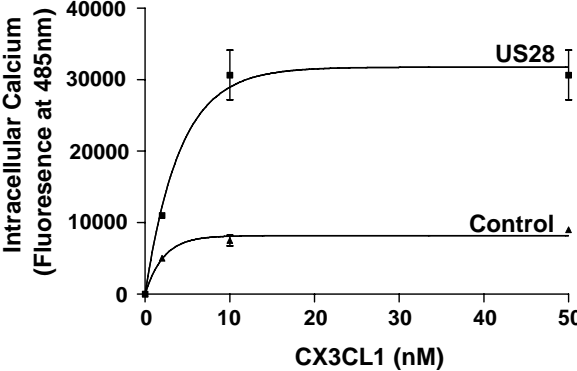

A)

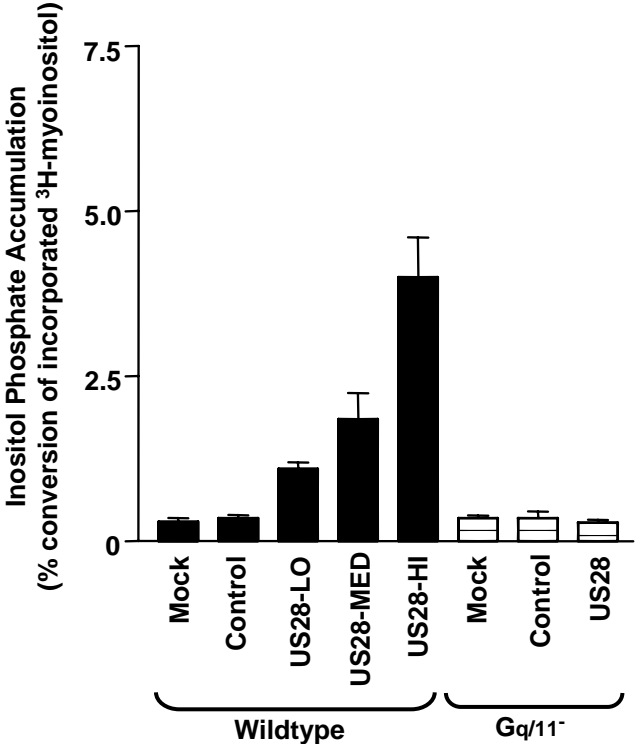

B)

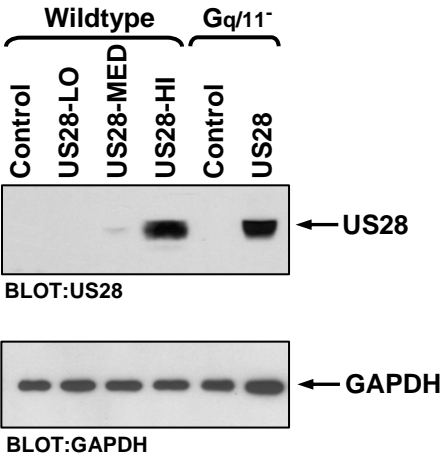

A)

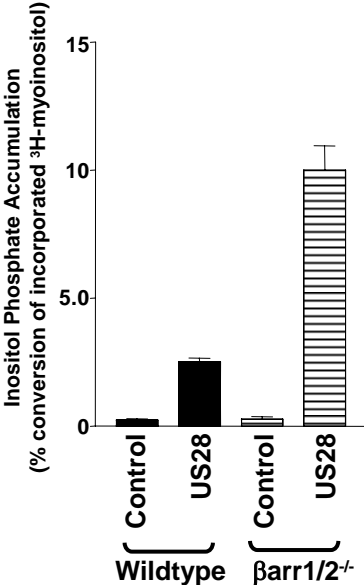

B)

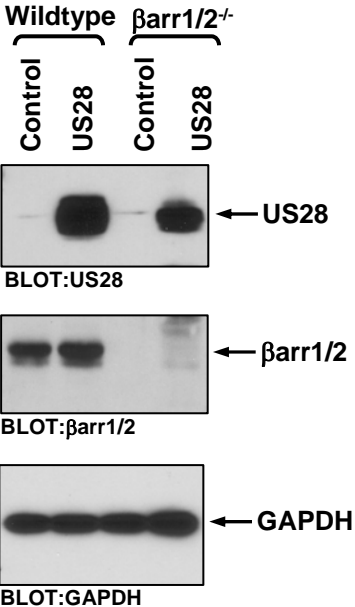

## Supplemental Figure Legends

**Supplemental Figure 1. Restriction mapping and Southern hybridization confirms the integrity of the US28/FL1-314 mutant.** A) FIX-BAC DNA from the parental BAC, US28/WT, and US28/1-314 was digested with BglII, electrophoresed on a 0.6% agarose gel, and visualized by ethidium bromide staining. B) BglII digested BAC DNA was subjected to Southern blotting the blot was hybridized with a [<sup>32</sup>P]-oligonucleotide probe internal to the US28 gene corresponding to nucleotides 23758-23788 in FIX-BAC. The probe recognizes only a single BglII fragment containing the US28 gene. The predicted molecular weight of this fragment is 14707 bp for the parental BAC, 14820 bp for US28/WT, and 14700 bp for US28/1-314.

**Supplemental Figure 2. US28 directed stimulation of Ca<sup>2+</sup> release requires the amino terminal ligand binding domain.** HFFs were infected with US28/WT, US28/1-314, US28 $\Delta$ N, or  $\Delta$ US28 viruses at an MOI of 3. At 48 hpi, the effects of CCL5 was measured by labeling cells with Fluo-4 AM and analyzing calcium signaling after addition of 10nM CCL5 using a FlexStation II Fluorometer. The calcium traces were followed out to 300 seconds (5 minutes) post addition of the CCL5. As observed in Figure 6, the US28/1-314 mutant protein exhibits an extended induction of Ca<sup>2+</sup> release, consistent with its inability to undergo desensitization. While US28/WT signaling returns to baseline at approximately 80-100 seconds, US28/1-314 signaling returns to baseline at approximately 200-250 seconds. The results also demonstrate that that US28 induced calcium signaling requires the presence of the amino terminal ligand binding domain, as the US28/ $\Delta$ N mutant which is deleted for the amino terminal 16 amino acids of US28 fails to induce any mobilization of calcium.

**Supplemental Figure 3. Determination of the EC<sub>50</sub> for CCL5 and CX3CL1 induced Ca<sup>2+</sup> signaling through US28.** HEK-293 cells stably expressing US28 were stimulated with increasing concentrations of CCL5 (upper panel) or CX3CL1 (lower panel) and calcium signaling was assessed by labeling cells with Fluo-4 AM and fluorescence measured using on a FlexStation II Fluorometer. Both CCL5 and CX3CL1 induces calcium signaling through US28 with and EC<sub>50</sub> of 2nM.

**Supplemental Figure 4. Agonist-independent US28 Stimulated Inositol Phosphate Accumulation Requires Gq/11 proteins.** A) Cells transduced with the control retrovirus MIGR1 or the US28 expressing retrovirus MIGR1-US28 were labelled with 1mCi/ml [<sup>3</sup>H]myo-inositol and accumulated inositol phosphates were isolated using anion exchange chromatography. The data represent at least six independent experiments performed in duplicate and are presented as a ratio of accumulated inositol phosphates to total [<sup>3</sup>H] incorporation. B) Analyses of US28 expression. US28 was immunoprecipitated from cell lysates using M2-agarose beads and immunoprecipitates were blotted for FLAG-tagged US28 using an  $\alpha$ -FLAG polyclonal antibody. GAPDH expression in whole cell extracts is shown for control purposes.

**Supplemental Figure 5. US28 exhibits hyperactive signaling activity in  $\beta$ arrestin deficient cells indicating a failure to be regulated by the cellular desensitization machinery.** A) Cells transduced with the control retrovirus MIGR1 or the US28 expressing retrovirus MIGR1-US28 were labelled with 1mCi/ml [<sup>3</sup>H]myo-inositol and accumulated inositol phosphates were isolated using anion exchange chromatography. The data represent at least four independent experiments performed in duplicate and are presented as a ratio of accumulated inositol phosphates to total [<sup>3</sup>H] incorporation. B) Analyses of US28 expression. US28 was immunoprecipitated from cell lysates using M2-agarose beads and immunoprecipitates were blotted for FLAG-tagged US28 using a  $\alpha$ -FLAG polyclonal antibody. GAPDH and  $\beta$ arrestin expression in whole cell extracts is shown for control purposes.
